# Supplementary material for: Mediterranean Diet Affects Blood Circulating Lipid-Soluble Micronutrients and Inflammatory Biomarkers in a Cohort of Breast Cancer Survivors: Results from the SETA Study
Source: MDPI journal article supplement (doi:10.3390/nu13103482), 2021-09-30
Supplement: s1 [file s1]

**Table S1.** Blood levels of metabolic parameters, plant pigments and vitamin as a function of fruit and vegetable intake

|                                          | Quartile of fruit and vegetables intake |            |            |            | RMSE  | P for linear response |
|------------------------------------------|-----------------------------------------|------------|------------|------------|-------|-----------------------|
|                                          | Quartile 1                              | Quartile 2 | Quartile 3 | Quartile 4 |       |                       |
| Metabolic parameters                     |                                         |            |            |            |       |                       |
| Ceruloplasmin, $\mu\text{mol/L}$         | 3.62                                    | 4.07       | 3.49       | 3.33       | 1.10  | 0.2964                |
| Haptoglobin, g/L                         | 1.04                                    | 1.07       | 1.21       | 1.12       | 0.29  | 0.2571                |
| GOT, U/L                                 | 30.10                                   | 24.48      | 18.17      | 21.32      | 20.1  | 0.1440                |
| GPT, U/L                                 | 17.3                                    | 13.4       | 8.2        | 9.6        | 16.2  | 0.1187                |
| GGT, U/L                                 | 49.0                                    | 36.3       | 13.1       | 23.8       | 63.2  | 0.1643                |
| Bilirubin, $\mu\text{mol/L}$             | 7.36                                    | 6.86       | 6.67       | 5.45       | 3.51  | 0.1368                |
| Paraoxonase, U/mL                        | 195.96                                  | 173.85     | 174.44     | 168.04     | 31.90 | 0.0178                |
| ROM, mg $\text{H}_2\text{O}_2/\text{dL}$ | 43.28                                   | 50.80      | 46.33      | 45.95      | 9.65  | 0.6195                |
| Thiolic groups, $\mu\text{mol/L}$        | 335.5                                   | 338.8      | 299.6      | 357.6      | 81.1  | 0.7630                |
| FRAP, $\mu\text{mol/L}$                  | 513.3                                   | 521.1      | 488.1      | 446.3      | 118.2 | 0.0917                |
| Plant pigments                           |                                         |            |            |            |       |                       |
| Lutein+zeaxanthin, mg/L                  | 0.32                                    | 0.35       | 0.27       | 0.27       | 0.15  | 0.1747                |
| B-Cryptoxanthin, $\mu\text{g/L}$         | 143.6                                   | 100.7      | 190.6      | 183.7      | 129.9 | 0.2001                |
| Lycopene, $\mu\text{g/L}$                | 0.47                                    | 0.57       | 0.64       | 0.32       | 0.54  | 0.5747                |
| Vitamins and pro-vitamins                |                                         |            |            |            |       |                       |
| Retinol, $\mu\text{g/dL}$                | 75.71                                   | 62.93      | 49.20      | 47.58      | 22.1  | 0.0002                |
| Tocopherol, $\mu\text{g/mL}$             | 11.17                                   | 11.55      | 12.98      | 16.88      | 3.54  | <0.0001               |
| $\beta$ -carotene, $\mu\text{g/L}$       | 29.27                                   | 40.52      | 48.30      | 64.84      | 36.5  | 0.0067                |

ALA: Alanine Aminotransferase; AST: Aspartate aminotransferase; FRAP: frap ferric reducing antioxidant power; GGT: Gamma-glutamyl transpeptidase; RMSE = Root Mean Square Error; SHp: thiol group

**Table S2.** Blood levels of metabolic parameters, plant pigments and vitamin as a function of animal foods intake

|                                           | Quartile of animal foods intake |            |            |            | RMSE  | P for linear response |
|-------------------------------------------|---------------------------------|------------|------------|------------|-------|-----------------------|
|                                           | Quartile 1                      | Quartile 2 | Quartile 3 | Quartile 4 |       |                       |
| Metabolic parameters                      |                                 |            |            |            |       |                       |
| Ceruloplasmin, μmol/L                     | 3.65                            | 3.67       | 3.82       | 3.90       | 1.12  | 0.5031                |
| Haptoglobin, g/L                          | 1.09                            | 1.08       | 1.10       | 1.13       | 0.30  | 0.7913                |
| AST, U/L                                  | 17.7                            | 24.0       | 23.3       | 37.3       | 19.4  | 0.0195                |
| ALA, U/L                                  | 8.2                             | 11.7       | 10.9       | 24.2       | 15.6  | 0.0247                |
| GGT, U/L                                  | 24.3                            | 23.4       | 37.9       | 55.6       | 63.4  | 0.2040                |
| Bilirubin, μmol/L                         | 6.20                            | 7.11       | 5.93       | 7.36       | 3.54  | 0.5844                |
| Paraoxonase, U/mL                         | 162.5                           | 183.5      | 186.3      | 192.2      | 31.6  | 0.0066                |
| ROM, mg H <sub>2</sub> O <sub>2</sub> /dL | 47.9                            | 45.1       | 45.8       | 47.8       | 10.0  | 0.7968                |
| SHp, μmol/L                               | 315.6                           | 353.9      | 338.7      | 342.8      | 81.9  | 0.3283                |
| FRAP, μmol/L                              | 461.3                           | 516.7      | 510.9      | 500.2      | 119.7 | 0.2564                |
| Plant pigments                            |                                 |            |            |            |       |                       |
| Lutein+zeaxanthin, mg/L                   | 0.24                            | 0.34       | 0.31       | 0.39       | 0.15  | 0.0118                |
| B-Cryptoxanthin, μg/L                     | 161.1                           | 201.4      | 167.4      | 130.1      | 130.3 | 0.5194                |
| Lycopene, μg/L                            | 0.22                            | 0.50       | 0.79       | 0.60       | 0.51  | 0.0074                |
| Vitamins and pro-vitamins                 |                                 |            |            |            |       |                       |
| Retinol, μg/dL                            | 47.7                            | 64.2       | 65.6       | 70.6       | 23.2  | 0.0048                |
| Tocopherol, μg/mL                         | 14.7                            | 13.6       | 11.6       | 10.7       | 3.9   | 0.0040                |
| β-carotene, μg/L                          | 48.1                            | 47.5       | 50.8       | 28.9       | 38.2  | 0.3539                |

ALA: Alanine Aminotransferase; AST: Aspartate aminotransferase; FRAP: frap ferric reducing antioxidant power; GGT: Gamma-glutamyl transpeptidase; RMSE = Root Mean Square Error; SHp: thiol group
